# Supplementary material for: Treatment strategies for limited-stage small cell carcinoma of the esophagus: evidence from a Chinese multicenter cohort study and the American SEER database
Source: PubMed Central journal article supplement — J Thorac Dis. 2024 Nov 26;16(11):7787–96. doi: 10.21037/jtd-24-1394 (PMC11635257; doi:10.21037/jtd-24-1394), 2024-11-26
Supplement: jtd-16-11-7787-dss.pdf [file jtd-16-11-7787-dss.pdf]

## Data Sharing Statement

|                     |                                                                                                                                                     |                                                                                                                                                                                                                                                                                                                                                                                           |
|---------------------|-----------------------------------------------------------------------------------------------------------------------------------------------------|-------------------------------------------------------------------------------------------------------------------------------------------------------------------------------------------------------------------------------------------------------------------------------------------------------------------------------------------------------------------------------------------|
| <b>Article Info</b> | <a href="https://dx.doi.org/10.21037/jtd-24-1394">https://dx.doi.org/10.21037/jtd-24-1394</a>                                                       |                                                                                                                                                                                                                                                                                                                                                                                           |
| <b>Item</b>         | <b>Question</b>                                                                                                                                     | <b>Authors' Response<br/>(place "-" if not applicable)</b>                                                                                                                                                                                                                                                                                                                                |
| 1                   | Would you like to share data collected for your study to others?                                                                                    | No.                                                                                                                                                                                                                                                                                                                                                                                       |
| 2                   | If not, would you like to share the reason for your decision?                                                                                       | According to the data management requirements of our hospital and the wishes of the participating patients in this study, we were sorry that we could not provide the raw data of this study publicly due to the protection of the patients' individual privacy rights. However, we have described in detail the various clinical characteristics and outcomes of the data in the article |
| 3                   | What data in particular will be shared?                                                                                                             | -                                                                                                                                                                                                                                                                                                                                                                                         |
| 4                   | Any other documents will be shared? Such as study protocol, statistical analysis plan, informed consent form, clinical study report, analytic code. | -                                                                                                                                                                                                                                                                                                                                                                                         |
| 5                   | When will data availability begin?                                                                                                                  | -                                                                                                                                                                                                                                                                                                                                                                                         |
| 6                   | When will data availability end?                                                                                                                    | -                                                                                                                                                                                                                                                                                                                                                                                         |
| 7                   | To whom will you share the data?                                                                                                                    | -                                                                                                                                                                                                                                                                                                                                                                                         |
| 8                   | For what type of analysis or purpose?                                                                                                               | -                                                                                                                                                                                                                                                                                                                                                                                         |
| 9                   | How or where can the data/documents be obtained?                                                                                                    | -                                                                                                                                                                                                                                                                                                                                                                                         |
| 10                  | Any other restrictions?                                                                                                                             | -                                                                                                                                                                                                                                                                                                                                                                                         |
